# Supplementary material for: Degradation of phenol by perborate in the presence of iron-bearing and carbonaceous materials
Source: Royal Society of Chemistry journal article supplement (doi:10.1039/d3ra06986a), 2023-01-01
Supplement: d3ra06986a1.pdf [file d3ra06986a1.pdf]

Title: Degradation of phenol by perborate in the presence of iron-bearing and carbonaceous materials

Authors: Seok-Young Oh, Jun-Hwan Kim

Department of Civil and Environmental Engineering, University of Ulsan, Ulsan 44610, South  
Korea

Supplementary Material

Number of pages: 3 (including a cover)

Number of figures: 2

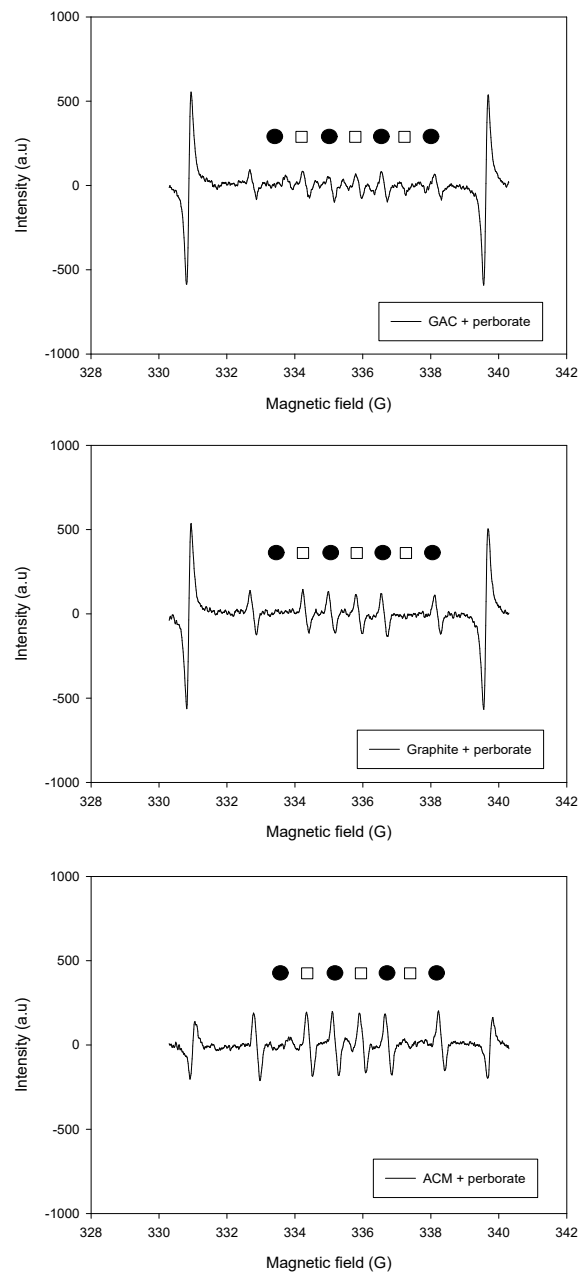

Fig. S1. EPR spectra of  $\cdot\text{OH}$  and  $\cdot\text{O}_2^-$  ( $\bullet$ : DMPO- $\cdot\text{OH}$ ;  $\square$ : DMPO- $\cdot\text{O}_2^-$ ) radicals obtained from perborate-carbonaceous material systems. The reaction time and reactor volume are 1 min and 20 mL, respectively. The initial concentrations of phenol and DMPO are 1.06 mM and 10 mM, respectively. The dosage of carbonaceous material is 200 mg. The pH is 7.0, adjusted with 0.1 mM phosphate buffer.

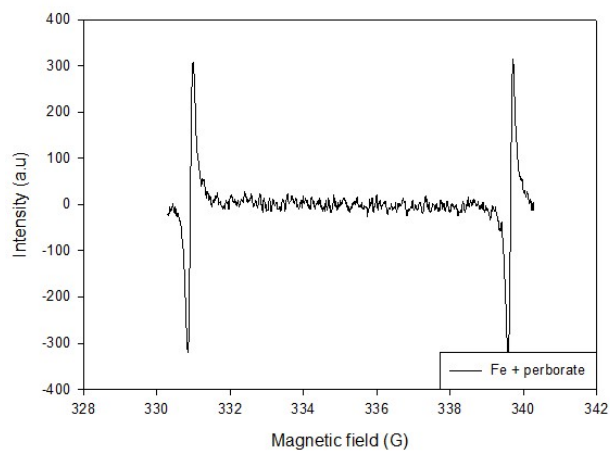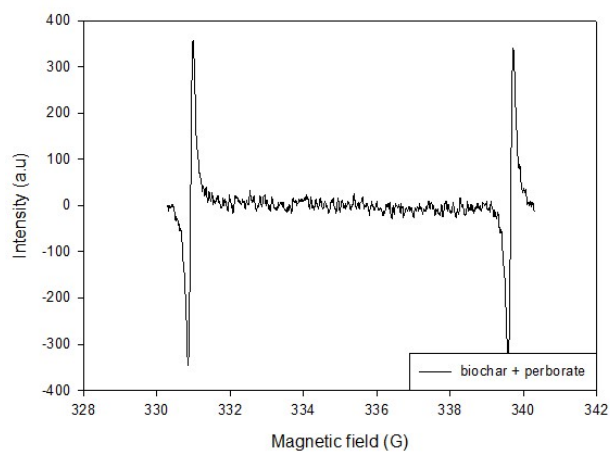

Fig. S2. EPR spectra of  $^1\text{O}_2$  (TEMPO- $^1\text{O}_2$ ) obtained from perborate-carbonaceous/iron material systems. The reaction time and reactor volume are 1 min and 20 mL, respectively. The initial concentrations of phenol and TEMPO are 1.0 mM and 10 mM, respectively. The dosage of carbonaceous/iron material is 100 mg. The pH is 7.0, adjusted with 0.1 mM phosphate buffer.
